# Supplementary material for: Rapid and Routine Molecular Typing Using Multiplex Polymerase Chain Reaction and MinION Sequencer
Source: Front Microbiol. 2022 Mar 29;13:875347. doi: 10.3389/fmicb.2022.875347 (PMC9002326; doi:10.3389/fmicb.2022.875347)
Supplement: Supplementary file 1 [file Data_Sheet_1.xlsx]

## Sheet: Primers
Primer sequences used in this study
Primer name	Sequence (5' -> 3')
arcC-F	GCATCGACAGCAAGCAACTA
arcC-R	AACCTTGCAAAGTGTCAGCA
aroE-F	GCAAAGAGAAACGCGATGTT
aroE-R	GGTTAAACTGACCGCCGTAAA
glpF-F	GGGAGATTTCTACGAGCCAAA
glpF-R	AACCCAACCTGATTGTGGAA
gmk-F	TGTGAACGCGTCCTGTTGTTA
gmk_R	TAACAGGGCGAATTTTACCG
pta-F	TGCCCAATCAACTGCATAAA
pta-R	CGAATGCGAAAGATTGCATA
tpiA-F	TGCCTGGTATCAAAGCAATCAA
tpiA-R	TAAGCCACTCGCTTCGATTT
yqiL-F	CAGCATACAGGACACCTATTGGC
yqiL-R	TGCACCTGGGTTCCCTGTTAGA

## Sheet: Run1
Sequence type predictions of Krocus and nanoMLST2 for Run1 in the first flow cell
Krocus prediction	ST	Percentage									nanoMLST2 prediction
barcode01	15	100	arcC(13)	aroE(13)	glpF(1)	gmk(1)	pta(12)	tpi(11)	yqiL(13)		barcode01	15
barcode02	188	100	arcC(3)	aroE(1)	glpF(1)	gmk(8)	pta(1)	tpi(1)	yqiL(1)		barcode02	188
barcode03	15	99.68	arcC(13)*	aroE(13)	glpF(1)	gmk(1)	pta(12)	tpi(11)	yqiL(13)		barcode03	New allele
barcode04	8	100	arcC(3)	aroE(3)	glpF(1)	gmk(1)	pta(4)	tpi(4)	yqiL(3)		barcode04	8
barcode05	239	100	arcC(2)	aroE(3)	glpF(1)	gmk(1)	pta(4)	tpi(4)	yqiL(3)		barcode05	239
barcode06	ND	85.75	arcC(151)	aroE(542)*	glpF(215)	gmk(34)*	pta(175)	tpi(180)*	yqiL(120)*		barcode06	LSD
barcode07	59	100	arcC(19)	aroE(23)	glpF(15)	gmk(2)	pta(19)	tpi(20)	yqiL(15)		barcode07	59
barcode08	15	100	arcC(13)	aroE(13)	glpF(1)	gmk(1)	pta(12)	tpi(11)	yqiL(13)		barcode08	15
barcode09	ND	75.79	arcC(151)	aroE(143)*	glpF(215)	pta(175)	tpi(28)*	yqiL(13)*			barcode09	LSD
barcode10	15	100	arcC(13)	aroE(13)	glpF(1)	gmk(1)	pta(12)	tpi(11)	yqiL(13)		barcode10	15
barcode11	59	100	arcC(19)	aroE(23)	glpF(15)	gmk(2)	pta(19)	tpi(20)	yqiL(15)		barcode11	59
barcode12	239	100	arcC(2)	aroE(3)	glpF(1)	gmk(1)	pta(4)	tpi(4)	yqiL(3)		barcode12	239
barcode13	508	100	arcC(10)	aroE(40)	glpF(8)	gmk(6)	pta(10)	tpi(3)	yqiL(2)		barcode13	508
barcode14	188	100	arcC(3)	aroE(1)	glpF(1)	gmk(8)	pta(1)	tpi(1)	yqiL(1)		barcode14	188
barcode15	8	100	arcC(3)	aroE(3)	glpF(1)	gmk(1)	pta(4)	tpi(4)	yqiL(3)		barcode15	8
barcode16	623	99.65	arcC(10)	aroE(3)	glpF(1)	gmk(1)	pta(4)*	tpi(4)	yqiL(3)		barcode16	New allele
barcode17	239	100	arcC(2)	aroE(3)	glpF(1)	gmk(1)	pta(4)	tpi(4)	yqiL(3)		barcode17	239
barcode18	8	100	arcC(3)	aroE(3)	glpF(1)	gmk(1)	pta(4)	tpi(4)	yqiL(3)		barcode18	8
barcode19	2990	100	arcC(1)	aroE(1)	glpF(1)	gmk(1)	pta(330)	tpi(1)	yqiL(10)		barcode19	2990
barcode20	8	100	arcC(3)	aroE(3)	glpF(1)	gmk(1)	pta(4)	tpi(4)	yqiL(3)		barcode20	8
barcode21	15	100	arcC(13)	aroE(13)	glpF(1)	gmk(1)	pta(12)	tpi(11)	yqiL(13)		barcode21	15
barcode22	8	100	arcC(3)	aroE(3)	glpF(1)	gmk(1)	pta(4)	tpi(4)	yqiL(3)		barcode22	8
barcode23	8	100	arcC(3)	aroE(3)	glpF(1)	gmk(1)	pta(4)	tpi(4)	yqiL(3)		barcode23	8
barcode24	15	100	arcC(13)	aroE(13)	glpF(1)	gmk(1)	pta(12)	tpi(11)	yqiL(13)		barcode24	15
barcode25	15	100	arcC(13)	aroE(13)	glpF(1)	gmk(1)	pta(12)	tpi(11)	yqiL(13)		barcode25	15
barcode26	15	100	arcC(13)	aroE(13)	glpF(1)	gmk(1)	pta(12)	tpi(11)	yqiL(13)		barcode26	15
barcode27	8	100	arcC(3)	aroE(3)	glpF(1)	gmk(1)	pta(4)	tpi(4)	yqiL(3)		barcode27	8
barcode28	6	100	arcC(12)	aroE(4)	glpF(1)	gmk(4)	pta(12)	tpi(1)	yqiL(3)		barcode28	6
barcode29	5	100	arcC(1)	aroE(4)	glpF(1)	gmk(4)	pta(12)	tpi(1)	yqiL(10)		barcode29	5
barcode30	5	100	arcC(1)	aroE(4)	glpF(1)	gmk(4)	pta(12)	tpi(1)	yqiL(10)		barcode30	5
barcode31	573	100	arcC(1)	aroE(1)	glpF(1)	gmk(1)	pta(12)	tpi(1)	yqiL(1)		barcode31	573
barcode32	7	99.71	arcC(5)	aroE(4)	glpF(1)	gmk(4)	pta(4)	tpi(6)*	yqiL(3)		barcode32	New allele
barcode33	8	100	arcC(3)	aroE(3)	glpF(1)	gmk(1)	pta(4)	tpi(4)	yqiL(3)		barcode33	8
barcode34	45	100	arcC(10)	aroE(14)	glpF(8)	gmk(6)	pta(10)	tpi(3)	yqiL(2)		barcode34	45
barcode35	97	100	arcC(3)	aroE(1)	glpF(1)	gmk(1)	pta(1)	tpi(5)	yqiL(3)		barcode35	97
barcode36	59	100	arcC(19)	aroE(23)	glpF(15)	gmk(2)	pta(19)	tpi(20)	yqiL(15)		barcode36	New allele
barcode37	8	100	arcC(3)	aroE(3)	glpF(1)	gmk(1)	pta(4)	tpi(4)	yqiL(3)		barcode37	8
barcode38	30	100	arcC(2)	aroE(2)	glpF(2)	gmk(2)	pta(6)	tpi(3)	yqiL(2)		barcode38	30
barcode39	239	100	arcC(2)	aroE(3)	glpF(1)	gmk(1)	pta(4)	tpi(4)	yqiL(3)		barcode39	239
barcode40	188	100	arcC(3)	aroE(1)	glpF(1)	gmk(8)	pta(1)	tpi(1)	yqiL(1)		barcode40	188
barcode41	1282	100	arcC(2)	aroE(202)	glpF(1)	gmk(1)	pta(4)	tpi(4)	yqiL(3)		barcode41	1282
barcode42	239	100	arcC(2)	aroE(3)	glpF(1)	gmk(1)	pta(4)	tpi(4)	yqiL(3)		barcode42	239
barcode43	ND	100	arcC(3)	aroE(35)	glpF(19)	gmk(2)	pta(20)	tpi(58)	yqiL(39)		barcode43	2772
barcode44	15	100	arcC(13)	aroE(13)	glpF(1)	gmk(1)	pta(12)	tpi(11)	yqiL(13)		barcode44	15
barcode45	6	100	arcC(12)	aroE(4)	glpF(1)	gmk(4)	pta(12)	tpi(1)	yqiL(3)		barcode45	6
barcode46	97	100	arcC(3)	aroE(1)	glpF(1)	gmk(1)	pta(1)	tpi(5)	yqiL(3)		barcode46	97
barcode47	15	100	arcC(13)	aroE(13)	glpF(1)	gmk(1)	pta(12)	tpi(11)	yqiL(13)		barcode47	15
barcode48	15	100	arcC(13)	aroE(13)	glpF(1)	gmk(1)	pta(12)	tpi(11)	yqiL(13)		barcode48	15
barcode49	45	100	arcC(10)	aroE(14)	glpF(8)	gmk(6)	pta(10)	tpi(3)	yqiL(2)		barcode49	45
barcode50	59	100	arcC(19)	aroE(23)	glpF(15)	gmk(2)	pta(19)	tpi(20)	yqiL(15)		barcode50	59
barcode51	15	100	arcC(13)	aroE(13)	glpF(1)	gmk(1)	pta(12)	tpi(11)	yqiL(13)		barcode51	15
barcode52	30	100	arcC(2)	aroE(2)	glpF(2)	gmk(2)	pta(6)	tpi(3)	yqiL(2)		barcode52	30
barcode53	239	100	arcC(2)	aroE(3)	glpF(1)	gmk(1)	pta(4)	tpi(4)	yqiL(3)		barcode53	239
barcode54	239	100	arcC(2)	aroE(3)	glpF(1)	gmk(1)	pta(4)	tpi(4)	yqiL(3)		barcode54	239
barcode55	8	100	arcC(3)	aroE(3)	glpF(1)	gmk(1)	pta(4)	tpi(4)	yqiL(3)		barcode55	8
barcode56	15	100	arcC(13)	aroE(13)	glpF(1)	gmk(1)	pta(12)	tpi(11)	yqiL(13)		barcode56	15
barcode57	239	100	arcC(2)	aroE(3)	glpF(1)	gmk(1)	pta(4)	tpi(4)	yqiL(3)		barcode57	239
barcode58	239	100	arcC(2)	aroE(3)	glpF(1)	gmk(1)	pta(4)	tpi(4)	yqiL(3)		barcode58	239
barcode59	1	99.71	arcC(1)	aroE(1)	glpF(1)	gmk(1)	pta(1)	tpi(1)*	yqiL(1)		barcode59	New allele
barcode60	188	100	arcC(3)	aroE(1)	glpF(1)	gmk(8)	pta(1)	tpi(1)	yqiL(1)		barcode60	188
barcode61	59	100	arcC(19)	aroE(23)	glpF(15)	gmk(2)	pta(19)	tpi(20)	yqiL(15)		barcode61	59
barcode62	2851	100	arcC(1)	aroE(417)	glpF(1)	gmk(1)	pta(1)	tpi(1)	yqiL(1)		barcode62	2851
barcode63	59	100	arcC(19)	aroE(23)	glpF(15)	gmk(2)	pta(19)	tpi(20)	yqiL(15)		barcode63	59
barcode64	8	100	arcC(3)	aroE(3)	glpF(1)	gmk(1)	pta(4)	tpi(4)	yqiL(3)		barcode64	8
barcode65	25	99.71	arcC(4)	aroE(1)	glpF(4)*	gmk(1)	pta(5)	tpi(5)	yqiL(4)		barcode65	New allele
barcode66	8	100	arcC(3)	aroE(3)	glpF(1)	gmk(1)	pta(4)	tpi(4)	yqiL(3)		barcode66	8
barcode67	8	100	arcC(3)	aroE(3)	glpF(1)	gmk(1)	pta(4)	tpi(4)	yqiL(3)		barcode67	8
barcode68	188	100	arcC(3)	aroE(1)	glpF(1)	gmk(8)	pta(1)	tpi(1)	yqiL(1)		barcode68	188
barcode69	8	100	arcC(3)	aroE(3)	glpF(1)	gmk(1)	pta(4)	tpi(4)	yqiL(3)		barcode69	8
barcode70	22	99.77	arcC(7)	aroE(6)*	glpF(1)	gmk(5)	pta(8)	tpi(8)	yqiL(6)		barcode70	New allele
barcode71	2631	100	arcC(4)	aroE(168)	glpF(1)	gmk(8)	pta(290)	tpi(10)	yqiL(8)		barcode71	2631
barcode72	239	99.77	arcC(2)*	aroE(3)	glpF(1)	gmk(1)	pta(4)	tpi(4)	yqiL(3)		barcode72	New allele
barcode73	30	100	arcC(2)	aroE(2)	glpF(2)	gmk(2)	pta(6)	tpi(3)	yqiL(2)		barcode73	30
barcode74	8	100	arcC(3)	aroE(3)	glpF(1)	gmk(1)	pta(4)	tpi(4)	yqiL(3)		barcode74	8
barcode75	8	100	arcC(3)	aroE(3)	glpF(1)	gmk(1)	pta(4)	tpi(4)	yqiL(3)		barcode75	8
barcode76	1232	100	arcC(3)	aroE(35)	glpF(167)	gmk(2)	pta(20)	tpi(26)	yqiL(39)		barcode76	1232
barcode77	2867	100	arcC(1)	aroE(152)	glpF(1)	gmk(8)	pta(1)	tpi(5)	yqiL(11)		barcode77	2867
barcode78	1	100	arcC(1)	aroE(1)	glpF(1)	gmk(1)	pta(1)	tpi(1)	yqiL(1)		barcode78	1
barcode79	239	100	arcC(2)	aroE(3)	glpF(1)	gmk(1)	pta(4)	tpi(4)	yqiL(3)		barcode79	239
barcode80	8	100	arcC(3)	aroE(3)	glpF(1)	gmk(1)	pta(4)	tpi(4)	yqiL(3)		barcode80	8
barcode81	8	100	arcC(3)	aroE(3)	glpF(1)	gmk(1)	pta(4)	tpi(4)	yqiL(3)		barcode81	8
barcode82	ND	72.98	arcC(151)	aroE(17)*	glpF(215)	gmk(12)*	pta(175)	tpi(28)*	yqiL(13)*		barcode82	LSD
barcode83	59	100	arcC(19)	aroE(23)	glpF(15)	gmk(2)	pta(19)	tpi(20)	yqiL(15)		barcode83	59
barcode84	239	100	arcC(2)	aroE(3)	glpF(1)	gmk(1)	pta(4)	tpi(4)	yqiL(3)		barcode84	239
barcode85	1	100	arcC(1)	aroE(1)	glpF(1)	gmk(1)	pta(1)	tpi(1)	yqiL(1)		barcode85	1
barcode86	15	100	arcC(13)	aroE(13)	glpF(1)	gmk(1)	pta(12)	tpi(11)	yqiL(13)		barcode86	15
barcode87	8	100	arcC(3)	aroE(3)	glpF(1)	gmk(1)	pta(4)	tpi(4)	yqiL(3)		barcode87	8
barcode88	2990	100	arcC(1)	aroE(1)	glpF(1)	gmk(1)	pta(330)	tpi(1)	yqiL(10)		barcode88	2990
barcode89	15	100	arcC(13)	aroE(13)	glpF(1)	gmk(1)	pta(12)	tpi(11)	yqiL(13)		barcode89	15
barcode90	1281	100	arcC(4)	aroE(168)	glpF(1)	gmk(8)	pta(1)	tpi(10)	yqiL(8)		barcode90	1281
barcode91	5	100	arcC(1)	aroE(4)	glpF(1)	gmk(4)	pta(12)	tpi(1)	yqiL(10)		barcode91	5
barcode92	1	100	arcC(1)	aroE(1)	glpF(1)	gmk(1)	pta(1)	tpi(1)	yqiL(1)		barcode92	1
barcode93	ND	100	arcC(1)	aroE(1)	glpF(1)	gmk(1)	pta(378)	tpi(1)	yqiL(1)		barcode93	New ST
barcode94	5535	99.87	arcC(19)	aroE(23)	glpF(15)	gmk(438)*	pta(19)	tpi(20)	yqiL(15)		barcode94	New allele
barcode95	59	100	arcC(19)	aroE(23)	glpF(15)	gmk(2)	pta(19)	tpi(20)	yqiL(15)		barcode95	59
barcode96	8	100	arcC(3)	aroE(3)	glpF(1)	gmk(1)	pta(4)	tpi(4)	yqiL(3)		barcode96	8

## Sheet: Run2
Sequence type predictions of Krocus and nanoMLST2 for Run2 in the first flow cell
Krocus prediction	ST	Percentage									nanoMLST2 prediction			Sanger sequencing
barcode01	8	100	arcC(3)	aroE(3)	glpF(1)	gmk(1)	pta(4)	tpi(4)	yqiL(3)		barcode01	8		8
barcode02	254	100	arcC(3)	aroE(32)	glpF(1)	gmk(1)	pta(4)	tpi(4)	yqiL(3)		barcode02	254		254
barcode03	254	100	arcC(3)	aroE(32)	glpF(1)	gmk(1)	pta(4)	tpi(4)	yqiL(3)		barcode03	254		254
barcode04	30	100	arcC(2)	aroE(2)	glpF(2)	gmk(2)	pta(6)	tpi(3)	yqiL(2)		barcode04	30		30
barcode05	241	100	arcC(2)	aroE(3)	glpF(1)	gmk(1)	pta(4)	tpi(4)	yqiL(30)		barcode05	241		241
barcode06	2339	100	arcC(2)	aroE(3)	glpF(1)	gmk(182)	pta(4)	tpi(4)	yqiL(3)		barcode06	2339		2339
barcode07	12	100	arcC(1)	aroE(3)	glpF(1)	gmk(8)	pta(11)	tpi(5)	yqiL(11)		barcode07	12		12
barcode08	254	100	arcC(3)	aroE(32)	glpF(1)	gmk(1)	pta(4)	tpi(4)	yqiL(3)		barcode08	254		254
barcode09	2340	100	arcC(255)	aroE(23)	glpF(15)	gmk(2)	pta(19)	tpi(20)	yqiL(15)		barcode09	2340		2340
barcode10	6	100	arcC(12)	aroE(4)	glpF(1)	gmk(4)	pta(12)	tpi(1)	yqiL(3)		barcode10	6		6
barcode11	2342	100	arcC(1)	aroE(4)	glpF(1)	gmk(4)	pta(254)	tpi(1)	yqiL(10)		barcode11	2342		2342
barcode12	89	100	arcC(1)	aroE(26)	glpF(28)	gmk(18)	pta(18)	tpi(33)	yqiL(50)		barcode12	89
barcode13	ND	80.7	arcC(151)	aroE(78)*	glpF(321)	gmk(34)	pta(256)	tpi(464)*	yqiL(15)*		barcode13	LSD
barcode14	900	100	arcC(107)	aroE(3)	glpF(1)	gmk(1)	pta(4)	tpi(4)	yqiL(3)		barcode14	900		900
barcode15	239	100	arcC(2)	aroE(3)	glpF(1)	gmk(1)	pta(4)	tpi(4)	yqiL(3)		barcode15	239
barcode16	2341	100	arcC(2)	aroE(3)	glpF(1)	gmk(181)	pta(4)	tpi(4)	yqiL(3)		barcode16	2341		2341
barcode17	8	100	arcC(3)	aroE(3)	glpF(1)	gmk(1)	pta(4)	tpi(4)	yqiL(3)		barcode17	8		8
barcode18	900	100	arcC(107)	aroE(3)	glpF(1)	gmk(1)	pta(4)	tpi(4)	yqiL(3)		barcode18	900		900
barcode19	59	100	arcC(19)	aroE(23)	glpF(15)	gmk(2)	pta(19)	tpi(20)	yqiL(15)		barcode19	59		59
barcode20	241	100	arcC(2)	aroE(3)	glpF(1)	gmk(1)	pta(4)	tpi(4)	yqiL(30)		barcode20	241		241
barcode21	508	100	arcC(10)	aroE(40)	glpF(8)	gmk(6)	pta(10)	tpi(3)	yqiL(2)		barcode21	508		508
barcode22	9	100	arcC(3)	aroE(3)	glpF(1)	gmk(1)	pta(1)	tpi(1)	yqiL(10)		barcode22	9		9
barcode23	59	100	arcC(19)	aroE(23)	glpF(15)	gmk(2)	pta(19)	tpi(20)	yqiL(15)		barcode23	59
barcode24	777	100	arcC(19)	aroE(23)	glpF(15)	gmk(2)	pta(19)	tpi(20)	yqiL(98)		barcode24	777		777
barcode25	7	100	arcC(5)	aroE(4)	glpF(1)	gmk(4)	pta(4)	tpi(6)	yqiL(3)		barcode25	7		7
barcode26	2343	100	arcC(3)	aroE(333)	glpF(1)	gmk(1)	pta(1)	tpi(1)	yqiL(10)		barcode26	2343		2343
barcode27	239	100	arcC(2)	aroE(3)	glpF(1)	gmk(1)	pta(4)	tpi(4)	yqiL(3)		barcode27	239		239
barcode28	188	100	arcC(3)	aroE(1)	glpF(1)	gmk(8)	pta(1)	tpi(1)	yqiL(1)		barcode28	188		188
barcode29	2344	100	arcC(2)	aroE(334)	glpF(1)	gmk(1)	pta(4)	tpi(4)	yqiL(3)		barcode29	2344		2344
barcode30	78	100	arcC(22)	aroE(1)	glpF(14)	gmk(23)	pta(12)	tpi(53)	yqiL(31)		barcode30	78		78
barcode31	508	100	arcC(10)	aroE(40)	glpF(8)	gmk(6)	pta(10)	tpi(3)	yqiL(2)		barcode31	508		508
barcode32	573	100	arcC(1)	aroE(1)	glpF(1)	gmk(1)	pta(12)	tpi(1)	yqiL(1)		barcode32	573		573
barcode33	338	100	arcC(19)	aroE(23)	glpF(15)	gmk(48)	pta(19)	tpi(20)	yqiL(15)		barcode33	338		338
barcode34	2345	100	arcC(19)	aroE(23)	glpF(15)	gmk(2)	pta(252)	tpi(20)	yqiL(15)		barcode34	2345		2345
barcode35	2346	100	arcC(2)	aroE(3)	glpF(1)	gmk(1)	pta(253)	tpi(4)	yqiL(3)		barcode35	2346		2346
barcode36	239	100	arcC(2)	aroE(3)	glpF(1)	gmk(1)	pta(4)	tpi(4)	yqiL(3)		barcode36	239
barcode37	9	100	arcC(3)	aroE(3)	glpF(1)	gmk(1)	pta(1)	tpi(1)	yqiL(10)		barcode37	9		9
barcode38	239	100	arcC(2)	aroE(3)	glpF(1)	gmk(1)	pta(4)	tpi(4)	yqiL(3)		barcode38	239		239
barcode39	1	100	arcC(1)	aroE(1)	glpF(1)	gmk(1)	pta(1)	tpi(1)	yqiL(1)		barcode39	1		1
barcode40	59	100	arcC(19)	aroE(23)	glpF(15)	gmk(2)	pta(19)	tpi(20)	yqiL(15)		barcode40	59		59
barcode41	239	100	arcC(2)	aroE(3)	glpF(1)	gmk(1)	pta(4)	tpi(4)	yqiL(3)		barcode41	239
barcode42	508	100	arcC(10)	aroE(40)	glpF(8)	gmk(6)	pta(10)	tpi(3)	yqiL(2)		barcode42	508		508
barcode43	2347	100	arcC(254)	aroE(3)	glpF(1)	gmk(1)	pta(4)	tpi(4)	yqiL(3)		barcode43	2347		2347
barcode44	59	100	arcC(19)	aroE(23)	glpF(15)	gmk(2)	pta(19)	tpi(20)	yqiL(15)		barcode44	59		59
barcode45	444	100	arcC(58)	aroE(3)	glpF(1)	gmk(1)	pta(4)	tpi(4)	yqiL(3)		barcode45	444		444
barcode46	ND	100	arcC(3)	aroE(35)	glpF(19)	gmk(2)	pta(20)	tpi(58)	yqiL(39)		barcode46	398		398
barcode47	5	100	arcC(1)	aroE(4)	glpF(1)	gmk(4)	pta(12)	tpi(1)	yqiL(10)		barcode47	5		5
barcode48	59	100	arcC(19)	aroE(23)	glpF(15)	gmk(2)	pta(19)	tpi(20)	yqiL(15)		barcode48	59
barcode49	2348	100	arcC(19)	aroE(335)	glpF(15)	gmk(2)	pta(19)	tpi(20)	yqiL(15)		barcode49	2348		2348
barcode50	45	100	arcC(10)	aroE(14)	glpF(8)	gmk(6)	pta(10)	tpi(3)	yqiL(2)		barcode50	45		45
barcode51	5	100	arcC(1)	aroE(4)	glpF(1)	gmk(4)	pta(12)	tpi(1)	yqiL(10)		barcode51	5		5
barcode52	30	100	arcC(2)	aroE(2)	glpF(2)	gmk(2)	pta(6)	tpi(3)	yqiL(2)		barcode52	30		30
barcode53	239	100	arcC(2)	aroE(3)	glpF(1)	gmk(1)	pta(4)	tpi(4)	yqiL(3)		barcode53	239		239
barcode54	97	100	arcC(3)	aroE(1)	glpF(1)	gmk(1)	pta(1)	tpi(5)	yqiL(3)		barcode54	97		97
barcode55	45	100	arcC(10)	aroE(14)	glpF(8)	gmk(6)	pta(10)	tpi(3)	yqiL(2)		barcode55	45
barcode56	89	100	arcC(1)	aroE(26)	glpF(28)	gmk(18)	pta(18)	tpi(33)	yqiL(50)		barcode56	89		89
barcode57	508	100	arcC(10)	aroE(40)	glpF(8)	gmk(6)	pta(10)	tpi(3)	yqiL(2)		barcode57	508
barcode58	5	100	arcC(1)	aroE(4)	glpF(1)	gmk(4)	pta(12)	tpi(1)	yqiL(10)		barcode58	5
barcode59	59	100	arcC(19)	aroE(23)	glpF(15)	gmk(2)	pta(19)	tpi(20)	yqiL(15)		barcode59	59
barcode60	45	100	arcC(10)	aroE(14)	glpF(8)	gmk(6)	pta(10)	tpi(3)	yqiL(2)		barcode60	45		45
barcode61	59	100	arcC(19)	aroE(23)	glpF(15)	gmk(2)	pta(19)	tpi(20)	yqiL(15)		barcode61	59
barcode62	5	100	arcC(1)	aroE(4)	glpF(1)	gmk(4)	pta(12)	tpi(1)	yqiL(10)		barcode62	5
barcode63	8	100	arcC(3)	aroE(3)	glpF(1)	gmk(1)	pta(4)	tpi(4)	yqiL(3)		barcode63	8
barcode64	59	100	arcC(19)	aroE(23)	glpF(15)	gmk(2)	pta(19)	tpi(20)	yqiL(15)		barcode64	59
barcode65	8	100	arcC(3)	aroE(3)	glpF(1)	gmk(1)	pta(4)	tpi(4)	yqiL(3)		barcode65	8
barcode66	45	100	arcC(10)	aroE(14)	glpF(8)	gmk(6)	pta(10)	tpi(3)	yqiL(2)		barcode66	45
barcode67	5	100	arcC(1)	aroE(4)	glpF(1)	gmk(4)	pta(12)	tpi(1)	yqiL(10)		barcode67	5
barcode68	239	100	arcC(2)	aroE(3)	glpF(1)	gmk(1)	pta(4)	tpi(4)	yqiL(3)		barcode68	239
barcode69	239	100	arcC(2)	aroE(3)	glpF(1)	gmk(1)	pta(4)	tpi(4)	yqiL(3)		barcode69	239
barcode70	508	99.87	arcC(10)	aroE(40)*	glpF(8)	gmk(6)	pta(10)	tpi(3)	yqiL(2)		barcode70	508
barcode71	30	100	arcC(2)	aroE(2)	glpF(2)	gmk(2)	pta(6)	tpi(3)	yqiL(2)		barcode71	30
barcode72	8	100	arcC(3)	aroE(3)	glpF(1)	gmk(1)	pta(4)	tpi(4)	yqiL(3)		barcode72	8
barcode73	8	100	arcC(3)	aroE(3)	glpF(1)	gmk(1)	pta(4)	tpi(4)	yqiL(3)		barcode73	8		8
barcode74	573	100	arcC(1)	aroE(1)	glpF(1)	gmk(1)	pta(12)	tpi(1)	yqiL(1)		barcode74	573
barcode75	8	100	arcC(3)	aroE(3)	glpF(1)	gmk(1)	pta(4)	tpi(4)	yqiL(3)		barcode75	8
barcode76	5	100	arcC(1)	aroE(4)	glpF(1)	gmk(4)	pta(12)	tpi(1)	yqiL(10)		barcode76	5
barcode77	ND	100	arcC(2)	aroE(3)	glpF(513)	gmk(1)	pta(664)	tpi(4)	yqiL(3)		barcode77	New ST		pta_664
barcode78	59	100	arcC(19)	aroE(23)	glpF(15)	gmk(2)	pta(19)	tpi(20)	yqiL(15)		barcode78	59
barcode79	573	100	arcC(1)	aroE(1)	glpF(1)	gmk(1)	pta(12)	tpi(1)	yqiL(1)		barcode79	573
barcode80	59	100	arcC(19)	aroE(23)	glpF(15)	gmk(2)	pta(19)	tpi(20)	yqiL(15)		barcode80	59
barcode81	59	100	arcC(19)	aroE(23)	glpF(15)	gmk(2)	pta(19)	tpi(20)	yqiL(15)		barcode81	59
barcode82	239	100	arcC(2)	aroE(3)	glpF(1)	gmk(1)	pta(4)	tpi(4)	yqiL(3)		barcode82	239
barcode83	59	100	arcC(19)	aroE(23)	glpF(15)	gmk(2)	pta(19)	tpi(20)	yqiL(15)		barcode83	59
barcode84	59	100	arcC(19)	aroE(23)	glpF(15)	gmk(2)	pta(19)	tpi(20)	yqiL(15)		barcode84	59
barcode85	45	100	arcC(10)	aroE(14)	glpF(8)	gmk(6)	pta(10)	tpi(3)	yqiL(2)		barcode85	45
barcode86	5	100	arcC(1)	aroE(4)	glpF(1)	gmk(4)	pta(12)	tpi(1)	yqiL(10)		barcode86	5
barcode87	5	100	arcC(1)	aroE(4)	glpF(1)	gmk(4)	pta(12)	tpi(1)	yqiL(10)		barcode87	5
barcode88	8	100	arcC(3)	aroE(3)	glpF(1)	gmk(1)	pta(4)	tpi(4)	yqiL(3)		barcode88	8
barcode89	ND	100	arcC(19)	aroE(23)	glpF(732)	gmk(2)	pta(19)	tpi(20)	yqiL(15)		barcode89	New ST		glpF_732
barcode90	59	100	arcC(19)	aroE(23)	glpF(15)	gmk(2)	pta(19)	tpi(20)	yqiL(15)		barcode90	59
barcode91	59	100	arcC(19)	aroE(23)	glpF(15)	gmk(2)	pta(19)	tpi(20)	yqiL(15)		barcode91	59
barcode92	59	100	arcC(19)	aroE(23)	glpF(15)	gmk(2)	pta(19)	tpi(20)	yqiL(15)		barcode92	59
barcode93	239	100	arcC(2)	aroE(3)	glpF(1)	gmk(1)	pta(4)	tpi(4)	yqiL(3)		barcode93	239
barcode94	59	100	arcC(19)	aroE(23)	glpF(15)	gmk(2)	pta(19)	tpi(20)	yqiL(15)		barcode94	59
barcode95	239	100	arcC(2)	aroE(3)	glpF(1)	gmk(1)	pta(4)	tpi(4)	yqiL(3)		barcode95	239
barcode96	59	100	arcC(19)	aroE(23)	glpF(15)	gmk(2)	pta(19)	tpi(20)	yqiL(15)		barcode96	59

## Sheet: Run3
Sequence type predictions of Krocus and nanoMLST2 for Run3 in the first flow cell
Krocus prediction	ST	Percentage									nanoMLST2 prediction
barcode01	25	100	arcC(4)	aroE(1)	glpF(4)	gmk(1)	pta(5)	tpi(5)	yqiL(4)		barcode01	25
barcode02	8	100	arcC(3)	aroE(3)	glpF(1)	gmk(1)	pta(4)	tpi(4)	yqiL(3)		barcode02	8
barcode03	15	100	arcC(13)	aroE(13)	glpF(1)	gmk(1)	pta(12)	tpi(11)	yqiL(13)		barcode03	15
barcode04	30	100	arcC(2)	aroE(2)	glpF(2)	gmk(2)	pta(6)	tpi(3)	yqiL(2)		barcode04	30
barcode05	8	100	arcC(3)	aroE(3)	glpF(1)	gmk(1)	pta(4)	tpi(4)	yqiL(3)		barcode05	8
barcode06	7	100	arcC(5)	aroE(4)	glpF(1)	gmk(4)	pta(4)	tpi(6)	yqiL(3)		barcode06	7
barcode07	97	100	arcC(3)	aroE(1)	glpF(1)	gmk(1)	pta(1)	tpi(5)	yqiL(3)		barcode07	97
barcode08	8	100	arcC(3)	aroE(3)	glpF(1)	gmk(1)	pta(4)	tpi(4)	yqiL(3)		barcode08	8
barcode09	5459	100	arcC(652)	aroE(13)	glpF(1)	gmk(1)	pta(12)	tpi(11)	yqiL(13)		barcode09	5459
barcode10	188	100	arcC(3)	aroE(1)	glpF(1)	gmk(8)	pta(1)	tpi(1)	yqiL(1)		barcode10	188
barcode11	7	100	arcC(5)	aroE(4)	glpF(1)	gmk(4)	pta(4)	tpi(6)	yqiL(3)		barcode11	7
barcode12	59	100	arcC(19)	aroE(23)	glpF(15)	gmk(2)	pta(19)	tpi(20)	yqiL(15)		barcode12	59
barcode13	59	100	arcC(19)	aroE(23)	glpF(15)	gmk(2)	pta(19)	tpi(20)	yqiL(15)		barcode13	New allele
barcode14	8	100	arcC(3)	aroE(3)	glpF(1)	gmk(1)	pta(4)	tpi(4)	yqiL(3)		barcode14	8
barcode15	188	100	arcC(3)	aroE(1)	glpF(1)	gmk(8)	pta(1)	tpi(1)	yqiL(1)		barcode15	188
barcode16	239	100	arcC(2)	aroE(3)	glpF(1)	gmk(1)	pta(4)	tpi(4)	yqiL(3)		barcode16	239
barcode17	15	100	arcC(13)	aroE(13)	glpF(1)	gmk(1)	pta(12)	tpi(11)	yqiL(13)		barcode17	15
barcode18	45	100	arcC(10)	aroE(14)	glpF(8)	gmk(6)	pta(10)	tpi(3)	yqiL(2)		barcode18	45
barcode19	1	100	arcC(1)	aroE(1)	glpF(1)	gmk(1)	pta(1)	tpi(1)	yqiL(1)		barcode19	1
barcode20	45	100	arcC(10)	aroE(14)	glpF(8)	gmk(6)	pta(10)	tpi(3)	yqiL(2)		barcode20	45
barcode21	188	100	arcC(3)	aroE(1)	glpF(1)	gmk(8)	pta(1)	tpi(1)	yqiL(1)		barcode21	188
barcode22	59	100	arcC(19)	aroE(23)	glpF(15)	gmk(2)	pta(19)	tpi(20)	yqiL(15)		barcode22	59
barcode23	1232	100	arcC(3)	aroE(35)	glpF(167)	gmk(2)	pta(20)	tpi(26)	yqiL(39)		barcode23	1232
barcode24	101	100	arcC(3)	aroE(1)	glpF(14)	gmk(15)	pta(11)	tpi(19)	yqiL(3)		barcode24	101
barcode25	188	100	arcC(3)	aroE(1)	glpF(1)	gmk(8)	pta(1)	tpi(1)	yqiL(1)		barcode25	188
barcode26	96	100	arcC(12)	aroE(1)	glpF(1)	gmk(15)	pta(11)	tpi(1)	yqiL(40)		barcode26	96
barcode27	8	100	arcC(3)	aroE(3)	glpF(1)	gmk(1)	pta(4)	tpi(4)	yqiL(3)		barcode27	8
barcode28	1	100	arcC(1)	aroE(1)	glpF(1)	gmk(1)	pta(1)	tpi(1)	yqiL(1)		barcode28	1
barcode29	188	100	arcC(3)	aroE(1)	glpF(1)	gmk(8)	pta(1)	tpi(1)	yqiL(1)		barcode29	New allele
barcode30	1	100	arcC(1)	aroE(1)	glpF(1)	gmk(1)	pta(1)	tpi(1)	yqiL(1)		barcode30	1
barcode31	15	100	arcC(13)	aroE(13)	glpF(1)	gmk(1)	pta(12)	tpi(11)	yqiL(13)		barcode31	15
barcode32	59	100	arcC(19)	aroE(23)	glpF(15)	gmk(2)	pta(19)	tpi(20)	yqiL(15)		barcode32	59
barcode33	3260	100	arcC(19)	aroE(23)	glpF(15)	gmk(2)	pta(375)	tpi(20)	yqiL(15)		barcode33	3260
barcode34	59	100	arcC(19)	aroE(23)	glpF(15)	gmk(2)	pta(19)	tpi(20)	yqiL(15)		barcode34	59
barcode35	7	99.58	arcC(5)	aroE(4)*	glpF(1)	gmk(4)	pta(4)	tpi(6)	yqiL(3)		barcode35	7
barcode36	15	100	arcC(13)	aroE(13)	glpF(1)	gmk(1)	pta(12)	tpi(11)	yqiL(13)		barcode36	15
barcode37	5	100	arcC(1)	aroE(4)	glpF(1)	gmk(4)	pta(12)	tpi(1)	yqiL(10)		barcode37	5
barcode38	45	100	arcC(10)	aroE(14)	glpF(8)	gmk(6)	pta(10)	tpi(3)	yqiL(2)		barcode38	45
barcode39	398	100	arcC(3)	aroE(35)	glpF(19)	gmk(2)	pta(20)	tpi(26)	yqiL(39)		barcode39	2772
barcode40	1821	100	arcC(12)	aroE(3)	glpF(1)	gmk(1)	pta(40)	tpi(4)	yqiL(3)		barcode40	1821
barcode41	ND	100	arcC(13)	aroE(13)	glpF(1)	gmk(1)	pta(785)	tpi(11)	yqiL(13)		barcode41	New ST
barcode42	ND	100	arcC(3)	aroE(35)	glpF(167)	gmk(2)	pta(20)	tpi(58)	yqiL(39)		barcode42	1232
barcode43	15	100	arcC(13)	aroE(13)	glpF(1)	gmk(1)	pta(12)	tpi(11)	yqiL(13)		barcode43	15
barcode44	15	100	arcC(13)	aroE(13)	glpF(1)	gmk(1)	pta(12)	tpi(11)	yqiL(13)		barcode44	15
barcode45	15	100	arcC(13)	aroE(13)	glpF(1)	gmk(1)	pta(12)	tpi(11)	yqiL(13)		barcode45	15
barcode46	30	100	arcC(2)	aroE(2)	glpF(2)	gmk(2)	pta(6)	tpi(3)	yqiL(2)		barcode46	30
barcode47	15	100	arcC(13)	aroE(13)	glpF(1)	gmk(1)	pta(12)	tpi(11)	yqiL(13)		barcode47	15
barcode48	291	100	arcC(3)	aroE(37)	glpF(19)	gmk(2)	pta(20)	tpi(26)	yqiL(32)		barcode48	New allele
barcode49	8	100	arcC(3)	aroE(3)	glpF(1)	gmk(1)	pta(4)	tpi(4)	yqiL(3)		barcode49	8
barcode50	15	100	arcC(13)	aroE(13)	glpF(1)	gmk(1)	pta(12)	tpi(11)	yqiL(13)		barcode50	15
barcode51	ND	100	arcC(3)	aroE(35)	glpF(167)	gmk(2)	pta(20)	tpi(58)	yqiL(39)		barcode51	1232
barcode52	1	100	arcC(1)	aroE(1)	glpF(1)	gmk(1)	pta(1)	tpi(1)	yqiL(1)		barcode52	1
barcode53	30	100	arcC(2)	aroE(2)	glpF(2)	gmk(2)	pta(6)	tpi(3)	yqiL(2)		barcode53	30
barcode54	2846	100	arcC(1)	aroE(414)	glpF(1)	gmk(4)	pta(12)	tpi(1)	yqiL(10)		barcode54	2846
barcode55	8	100	arcC(3)	aroE(3)	glpF(1)	gmk(1)	pta(4)	tpi(4)	yqiL(3)		barcode55	8
barcode56	15	100	arcC(13)	aroE(13)	glpF(1)	gmk(1)	pta(12)	tpi(11)	yqiL(13)		barcode56	15
barcode57	30	100	arcC(2)	aroE(2)	glpF(2)	gmk(2)	pta(6)	tpi(3)	yqiL(2)		barcode57	30
barcode58	1232	100	arcC(3)	aroE(35)	glpF(167)	gmk(2)	pta(20)	tpi(26)	yqiL(39)		barcode58	1232
barcode59	59	100	arcC(19)	aroE(23)	glpF(15)	gmk(2)	pta(19)	tpi(20)	yqiL(15)		barcode59	59
barcode60	508	100	arcC(10)	aroE(40)	glpF(8)	gmk(6)	pta(10)	tpi(3)	yqiL(2)		barcode60	508
barcode61	15	100	arcC(13)	aroE(13)	glpF(1)	gmk(1)	pta(12)	tpi(11)	yqiL(13)		barcode61	15
barcode62	30	100	arcC(2)	aroE(2)	glpF(2)	gmk(2)	pta(6)	tpi(3)	yqiL(2)		barcode62	30
barcode63	15	100	arcC(13)	aroE(13)	glpF(1)	gmk(1)	pta(12)	tpi(11)	yqiL(13)		barcode63	15
barcode64	15	100	arcC(13)	aroE(13)	glpF(1)	gmk(1)	pta(12)	tpi(11)	yqiL(13)		barcode64	15
barcode65	15	100	arcC(13)	aroE(13)	glpF(1)	gmk(1)	pta(12)	tpi(11)	yqiL(13)		barcode65	15
barcode66	239	100	arcC(2)	aroE(3)	glpF(1)	gmk(1)	pta(4)	tpi(4)	yqiL(3)		barcode66	239
barcode67	2772	100	arcC(3)	aroE(35)	glpF(344)	gmk(2)	pta(20)	tpi(26)	yqiL(39)		barcode67	2772
barcode68	59	100	arcC(19)	aroE(23)	glpF(15)	gmk(2)	pta(19)	tpi(20)	yqiL(15)		barcode68	59
barcode69	7	100	arcC(5)	aroE(4)	glpF(1)	gmk(4)	pta(4)	tpi(6)	yqiL(3)		barcode69	7
barcode70	12	100	arcC(1)	aroE(3)	glpF(1)	gmk(8)	pta(11)	tpi(5)	yqiL(11)		barcode70	12
barcode71	5225	100	arcC(19)	aroE(23)	glpF(15)	gmk(2)	pta(19)	tpi(20)	yqiL(694)		barcode71	5225
barcode72	15	100	arcC(13)	aroE(13)	glpF(1)	gmk(1)	pta(12)	tpi(11)	yqiL(13)		barcode72	15
barcode73	45	100	arcC(10)	aroE(14)	glpF(8)	gmk(6)	pta(10)	tpi(3)	yqiL(2)		barcode73	45
barcode74	239	100	arcC(2)	aroE(3)	glpF(1)	gmk(1)	pta(4)	tpi(4)	yqiL(3)		barcode74	239
barcode75	45	100	arcC(10)	aroE(14)	glpF(8)	gmk(6)	pta(10)	tpi(3)	yqiL(2)		barcode75	45
barcode76	59	100	arcC(19)	aroE(23)	glpF(15)	gmk(2)	pta(19)	tpi(20)	yqiL(15)		barcode76	59
barcode77	1	100	arcC(1)	aroE(1)	glpF(1)	gmk(1)	pta(1)	tpi(1)	yqiL(1)		barcode77	1
barcode78	1	100	arcC(1)	aroE(1)	glpF(1)	gmk(1)	pta(1)	tpi(1)	yqiL(1)		barcode78	1
barcode79	188	100	arcC(3)	aroE(1)	glpF(1)	gmk(8)	pta(1)	tpi(1)	yqiL(1)		barcode79	188
barcode80	4567	99.65	arcC(328)	aroE(35)*	glpF(19)	gmk(2)	pta(20)	tpi(26)	yqiL(39)		barcode80	New allele
barcode81	59	100	arcC(19)	aroE(23)	glpF(15)	gmk(2)	pta(19)	tpi(20)	yqiL(15)		barcode81	59
barcode82	59	100	arcC(19)	aroE(23)	glpF(15)	gmk(2)	pta(19)	tpi(20)	yqiL(15)		barcode82	59
barcode83	ND	67.14	arcC(151)	glpF(215)	pta(175)	tpi(180)*	yqiL(15)*				barcode83	LSD
barcode84	188	100	arcC(3)	aroE(1)	glpF(1)	gmk(8)	pta(1)	tpi(1)	yqiL(1)		barcode84	188
barcode85	30	100	arcC(2)	aroE(2)	glpF(2)	gmk(2)	pta(6)	tpi(3)	yqiL(2)		barcode85	30
barcode86	15	100	arcC(13)	aroE(13)	glpF(1)	gmk(1)	pta(12)	tpi(11)	yqiL(13)		barcode86	15
barcode87	8	100	arcC(3)	aroE(3)	glpF(1)	gmk(1)	pta(4)	tpi(4)	yqiL(3)		barcode87	8
barcode88	15	100	arcC(13)	aroE(13)	glpF(1)	gmk(1)	pta(12)	tpi(11)	yqiL(13)		barcode88	15
barcode89	ND	83.47	arcC(151)	aroE(13)*	glpF(215)	gmk(18)*	pta(175)	tpi(530)*	yqiL(13)*		barcode89	LSD
barcode90	188	100	arcC(3)	aroE(1)	glpF(1)	gmk(8)	pta(1)	tpi(1)	yqiL(1)		barcode90	188
barcode91	15	100	arcC(13)	aroE(13)	glpF(1)	gmk(1)	pta(12)	tpi(11)	yqiL(13)		barcode91	15
barcode92	30	100	arcC(2)	aroE(2)	glpF(2)	gmk(2)	pta(6)	tpi(3)	yqiL(2)		barcode92	30
barcode93	30	100	arcC(2)	aroE(2)	glpF(2)	gmk(2)	pta(6)	tpi(3)	yqiL(2)		barcode93	30
barcode94	45	100	arcC(10)	aroE(14)	glpF(8)	gmk(6)	pta(10)	tpi(3)	yqiL(2)		barcode94	45
barcode95	239	100	arcC(2)	aroE(3)	glpF(1)	gmk(1)	pta(4)	tpi(4)	yqiL(3)		barcode95	239
barcode96	15	100	arcC(13)	aroE(13)	glpF(1)	gmk(1)	pta(12)	tpi(11)	yqiL(13)		barcode96	15

## Sheet: Run4
Sequence type predictions of Krocus and nanoMLST2 for Run4 in the first flow cell
Krocus prediction	ST	Percentage									nanoMLST2			Aliquots from Run2	Sanger sequencing
barcode01	ND	100	arcC(19)	aroE(23)	glpF(732)	gmk(2)	pta(19)	tpi(20)	yqiL(15)		barcode01	New ST		barcode89	glpF_732
barcode02	59	100	arcC(19)	aroE(23)	glpF(15)	gmk(2)	pta(19)	tpi(20)	yqiL(15)		barcode02	59		barcode90
barcode03	59	100	arcC(19)	aroE(23)	glpF(15)	gmk(2)	pta(19)	tpi(20)	yqiL(15)		barcode03	59		barcode91
barcode04	59	100	arcC(19)	aroE(23)	glpF(15)	gmk(2)	pta(19)	tpi(20)	yqiL(15)		barcode04	59		barcode92
barcode05	239	100	arcC(2)	aroE(3)	glpF(1)	gmk(1)	pta(4)	tpi(4)	yqiL(3)		barcode05	239		barcode93
barcode06	59	100	arcC(19)	aroE(23)	glpF(15)	gmk(2)	pta(19)	tpi(20)	yqiL(15)		barcode06	59		barcode94
barcode07	239	100	arcC(2)	aroE(3)	glpF(1)	gmk(1)	pta(4)	tpi(4)	yqiL(3)		barcode07	239		barcode95
barcode08	59	100	arcC(19)	aroE(23)	glpF(15)	gmk(2)	pta(19)	tpi(20)	yqiL(15)		barcode08	59		barcode96
barcode09	8	100	arcC(3)	aroE(3)	glpF(1)	gmk(1)	pta(4)	tpi(4)	yqiL(3)		barcode09	8		barcode01	8
barcode10	254	100	arcC(3)	aroE(32)	glpF(1)	gmk(1)	pta(4)	tpi(4)	yqiL(3)		barcode10	254		barcode02	254
barcode11	254	100	arcC(3)	aroE(32)	glpF(1)	gmk(1)	pta(4)	tpi(4)	yqiL(3)		barcode11	254		barcode03	254
barcode12	30	100	arcC(2)	aroE(2)	glpF(2)	gmk(2)	pta(6)	tpi(3)	yqiL(2)		barcode12	30		barcode04	30
barcode13	241	100	arcC(2)	aroE(3)	glpF(1)	gmk(1)	pta(4)	tpi(4)	yqiL(30)		barcode13	241		barcode05	241
barcode14	2339	100	arcC(2)	aroE(3)	glpF(1)	gmk(182)	pta(4)	tpi(4)	yqiL(3)		barcode14	2339		barcode06	2339
barcode15	12	100	arcC(1)	aroE(3)	glpF(1)	gmk(8)	pta(11)	tpi(5)	yqiL(11)		barcode15	12		barcode07	12
barcode16	254	100	arcC(3)	aroE(32)	glpF(1)	gmk(1)	pta(4)	tpi(4)	yqiL(3)		barcode16	254		barcode08	254
barcode17	2340	100	arcC(255)	aroE(23)	glpF(15)	gmk(2)	pta(19)	tpi(20)	yqiL(15)		barcode17	2340		barcode09	2340
barcode18	6	100	arcC(12)	aroE(4)	glpF(1)	gmk(4)	pta(12)	tpi(1)	yqiL(3)		barcode18	6		barcode10	6
barcode19	2342	100	arcC(1)	aroE(4)	glpF(1)	gmk(4)	pta(254)	tpi(1)	yqiL(10)		barcode19	2342		barcode11	2342
barcode20	89	100	arcC(1)	aroE(26)	glpF(28)	gmk(18)	pta(18)	tpi(33)	yqiL(50)		barcode20	89		barcode12
barcode21	ND	96	arcC(151)	aroE(23)*	glpF(321)	gmk(34)*	pta(256)	tpi(464)	yqiL(3)*		barcode21	LSD		barcode13
barcode22	900	100	arcC(107)	aroE(3)	glpF(1)	gmk(1)	pta(4)	tpi(4)	yqiL(3)		barcode22	900		barcode14	900
barcode23	239	100	arcC(2)	aroE(3)	glpF(1)	gmk(1)	pta(4)	tpi(4)	yqiL(3)		barcode23	239		barcode15
barcode24	2341	100	arcC(2)	aroE(3)	glpF(1)	gmk(181)	pta(4)	tpi(4)	yqiL(3)		barcode24	2341		barcode16	2341
barcode25	8	100	arcC(3)	aroE(3)	glpF(1)	gmk(1)	pta(4)	tpi(4)	yqiL(3)		barcode25	8		barcode17	8
barcode26	900	100	arcC(107)	aroE(3)	glpF(1)	gmk(1)	pta(4)	tpi(4)	yqiL(3)		barcode26	900		barcode18	900
barcode27	59	100	arcC(19)	aroE(23)	glpF(15)	gmk(2)	pta(19)	tpi(20)	yqiL(15)		barcode27	59		barcode19	59
barcode28	241	100	arcC(2)	aroE(3)	glpF(1)	gmk(1)	pta(4)	tpi(4)	yqiL(30)		barcode28	241		barcode20	241
barcode29	508	99.9	arcC(10)	aroE(40)*	glpF(8)	gmk(6)	pta(10)	tpi(3)	yqiL(2)		barcode29	508		barcode21	508
barcode30	9	100	arcC(3)	aroE(3)	glpF(1)	gmk(1)	pta(1)	tpi(1)	yqiL(10)		barcode30	9		barcode22	9
barcode31	59	100	arcC(19)	aroE(23)	glpF(15)	gmk(2)	pta(19)	tpi(20)	yqiL(15)		barcode31	59		barcode23
barcode32	777	100	arcC(19)	aroE(23)	glpF(15)	gmk(2)	pta(19)	tpi(20)	yqiL(98)		barcode32	777		barcode24	777
barcode33	7	100	arcC(5)	aroE(4)	glpF(1)	gmk(4)	pta(4)	tpi(6)	yqiL(3)		barcode33	7		barcode25	7
barcode34	2343	100	arcC(3)	aroE(333)	glpF(1)	gmk(1)	pta(1)	tpi(1)	yqiL(10)		barcode34	2343		barcode26	2343
barcode35	239	100	arcC(2)	aroE(3)	glpF(1)	gmk(1)	pta(4)	tpi(4)	yqiL(3)		barcode35	239		barcode27	239
barcode36	188	100	arcC(3)	aroE(1)	glpF(1)	gmk(8)	pta(1)	tpi(1)	yqiL(1)		barcode36	188		barcode28	188
barcode37	2344	100	arcC(2)	aroE(334)	glpF(1)	gmk(1)	pta(4)	tpi(4)	yqiL(3)		barcode37	2344		barcode29	2344
barcode38	78	100	arcC(22)	aroE(1)	glpF(14)	gmk(23)	pta(12)	tpi(53)	yqiL(31)		barcode38	78		barcode30	78
barcode39	508	100	arcC(10)	aroE(40)	glpF(8)	gmk(6)	pta(10)	tpi(3)	yqiL(2)		barcode39	508		barcode31	508
barcode40	573	100	arcC(1)	aroE(1)	glpF(1)	gmk(1)	pta(12)	tpi(1)	yqiL(1)		barcode40	573		barcode32	573
barcode41	338	100	arcC(19)	aroE(23)	glpF(15)	gmk(48)	pta(19)	tpi(20)	yqiL(15)		barcode41	338		barcode33	338
barcode42	2345	100	arcC(19)	aroE(23)	glpF(15)	gmk(2)	pta(252)	tpi(20)	yqiL(15)		barcode42	2345		barcode34	2345
barcode43	2346	100	arcC(2)	aroE(3)	glpF(1)	gmk(1)	pta(253)	tpi(4)	yqiL(3)		barcode43	2346		barcode35	2346
barcode44	239	100	arcC(2)	aroE(3)	glpF(1)	gmk(1)	pta(4)	tpi(4)	yqiL(3)		barcode44	239		barcode36
barcode45	9	100	arcC(3)	aroE(3)	glpF(1)	gmk(1)	pta(1)	tpi(1)	yqiL(10)		barcode45	9		barcode37	9
barcode46	239	100	arcC(2)	aroE(3)	glpF(1)	gmk(1)	pta(4)	tpi(4)	yqiL(3)		barcode46	239		barcode38	239
barcode47	1	100	arcC(1)	aroE(1)	glpF(1)	gmk(1)	pta(1)	tpi(1)	yqiL(1)		barcode47	1		barcode39	1
barcode48	59	100	arcC(19)	aroE(23)	glpF(15)	gmk(2)	pta(19)	tpi(20)	yqiL(15)		barcode48	59		barcode40	59
barcode49	239	100	arcC(2)	aroE(3)	glpF(1)	gmk(1)	pta(4)	tpi(4)	yqiL(3)		barcode49	239		barcode41
barcode50	508	100	arcC(10)	aroE(40)	glpF(8)	gmk(6)	pta(10)	tpi(3)	yqiL(2)		barcode50	508		barcode42	508
barcode51	2347	100	arcC(254)	aroE(3)	glpF(1)	gmk(1)	pta(4)	tpi(4)	yqiL(3)		barcode51	2347		barcode43	2347
barcode52	59	100	arcC(19)	aroE(23)	glpF(15)	gmk(2)	pta(19)	tpi(20)	yqiL(15)		barcode52	59		barcode44	59
barcode53	444	100	arcC(58)	aroE(3)	glpF(1)	gmk(1)	pta(4)	tpi(4)	yqiL(3)		barcode53	444		barcode45	444
barcode54	398	100	arcC(3)	aroE(35)	glpF(19)	gmk(2)	pta(20)	tpi(26)	yqiL(39)		barcode54	398		barcode46	398
barcode55	5	100	arcC(1)	aroE(4)	glpF(1)	gmk(4)	pta(12)	tpi(1)	yqiL(10)		barcode55	5		barcode47	5
barcode56	59	100	arcC(19)	aroE(23)	glpF(15)	gmk(2)	pta(19)	tpi(20)	yqiL(15)		barcode56	59		barcode48
barcode57	2348	100	arcC(19)	aroE(335)	glpF(15)	gmk(2)	pta(19)	tpi(20)	yqiL(15)		barcode57	2348		barcode49	2348
barcode58	45	100	arcC(10)	aroE(14)	glpF(8)	gmk(6)	pta(10)	tpi(3)	yqiL(2)		barcode58	45		barcode50	45
barcode59	5	100	arcC(1)	aroE(4)	glpF(1)	gmk(4)	pta(12)	tpi(1)	yqiL(10)		barcode59	5		barcode51	5
barcode60	30	100	arcC(2)	aroE(2)	glpF(2)	gmk(2)	pta(6)	tpi(3)	yqiL(2)		barcode60	30		barcode52	30
barcode61	239	100	arcC(2)	aroE(3)	glpF(1)	gmk(1)	pta(4)	tpi(4)	yqiL(3)		barcode61	239		barcode53	239
barcode62	97	100	arcC(3)	aroE(1)	glpF(1)	gmk(1)	pta(1)	tpi(5)	yqiL(3)		barcode62	97		barcode54	97
barcode63	45	100	arcC(10)	aroE(14)	glpF(8)	gmk(6)	pta(10)	tpi(3)	yqiL(2)		barcode63	45		barcode55
barcode64	89	100	arcC(1)	aroE(26)	glpF(28)	gmk(18)	pta(18)	tpi(33)	yqiL(50)		barcode64	89		barcode56	89
barcode65	508	99.84	arcC(10)	aroE(40)*	glpF(8)	gmk(6)	pta(10)	tpi(3)	yqiL(2)		barcode65	508		barcode57
barcode66	5	100	arcC(1)	aroE(4)	glpF(1)	gmk(4)	pta(12)	tpi(1)	yqiL(10)		barcode66	5		barcode58
barcode67	59	100	arcC(19)	aroE(23)	glpF(15)	gmk(2)	pta(19)	tpi(20)	yqiL(15)		barcode67	59		barcode59
barcode68	45	100	arcC(10)	aroE(14)	glpF(8)	gmk(6)	pta(10)	tpi(3)	yqiL(2)		barcode68	45		barcode60	45
barcode69	59	100	arcC(19)	aroE(23)	glpF(15)	gmk(2)	pta(19)	tpi(20)	yqiL(15)		barcode69	59		barcode61
barcode70	5	100	arcC(1)	aroE(4)	glpF(1)	gmk(4)	pta(12)	tpi(1)	yqiL(10)		barcode70	5		barcode62
barcode71	8	100	arcC(3)	aroE(3)	glpF(1)	gmk(1)	pta(4)	tpi(4)	yqiL(3)		barcode71	8		barcode63
barcode72	59	100	arcC(19)	aroE(23)	glpF(15)	gmk(2)	pta(19)	tpi(20)	yqiL(15)		barcode72	59		barcode64
barcode73	59	100	arcC(19)	aroE(23)	glpF(15)	gmk(2)	pta(19)	tpi(20)	yqiL(15)		barcode73	59
barcode74	672	100	arcC(4)	aroE(3)	glpF(1)	gmk(1)	pta(11)	tpi(72)	yqiL(11)		barcode74	672
barcode75	672	100	arcC(4)	aroE(3)	glpF(1)	gmk(1)	pta(11)	tpi(72)	yqiL(11)		barcode75	672
barcode76	59	100	arcC(19)	aroE(23)	glpF(15)	gmk(2)	pta(19)	tpi(20)	yqiL(15)		barcode76	59
barcode77	8	100	arcC(3)	aroE(3)	glpF(1)	gmk(1)	pta(4)	tpi(4)	yqiL(3)		barcode77	8
barcode78	59	100	arcC(19)	aroE(23)	glpF(15)	gmk(2)	pta(19)	tpi(20)	yqiL(15)		barcode78	59
barcode79	59	100	arcC(19)	aroE(23)	glpF(15)	gmk(2)	pta(19)	tpi(20)	yqiL(15)		barcode79	59
barcode80	15	100	arcC(13)	aroE(13)	glpF(1)	gmk(1)	pta(12)	tpi(11)	yqiL(13)		barcode80	15
barcode81	8	100	arcC(3)	aroE(3)	glpF(1)	gmk(1)	pta(4)	tpi(4)	yqiL(3)		barcode81	8		barcode73	8
barcode82	573	100	arcC(1)	aroE(1)	glpF(1)	gmk(1)	pta(12)	tpi(1)	yqiL(1)		barcode82	573		barcode74
barcode83	8	100	arcC(3)	aroE(3)	glpF(1)	gmk(1)	pta(4)	tpi(4)	yqiL(3)		barcode83	8		barcode75
barcode84	5	100	arcC(1)	aroE(4)	glpF(1)	gmk(4)	pta(12)	tpi(1)	yqiL(10)		barcode84	5		barcode76
barcode85	ND	100	arcC(2)	aroE(3)	glpF(513)	gmk(1)	pta(664)	tpi(4)	yqiL(3)		barcode85	New ST		barcode77
barcode86	59	100	arcC(19)	aroE(23)	glpF(15)	gmk(2)	pta(19)	tpi(20)	yqiL(15)		barcode86	59		barcode78
barcode87	573	100	arcC(1)	aroE(1)	glpF(1)	gmk(1)	pta(12)	tpi(1)	yqiL(1)		barcode87	573		barcode79
barcode88	59	100	arcC(19)	aroE(23)	glpF(15)	gmk(2)	pta(19)	tpi(20)	yqiL(15)		barcode88	59		barcode80
barcode89	59	100	arcC(19)	aroE(23)	glpF(15)	gmk(2)	pta(19)	tpi(20)	yqiL(15)		barcode89	59		barcode81
barcode90	239	100	arcC(2)	aroE(3)	glpF(1)	gmk(1)	pta(4)	tpi(4)	yqiL(3)		barcode90	239		barcode82
barcode91	59	100	arcC(19)	aroE(23)	glpF(15)	gmk(2)	pta(19)	tpi(20)	yqiL(15)		barcode91	59		barcode83
barcode92	59	100	arcC(19)	aroE(23)	glpF(15)	gmk(2)	pta(19)	tpi(20)	yqiL(15)		barcode92	59		barcode84
barcode93	45	100	arcC(10)	aroE(14)	glpF(8)	gmk(6)	pta(10)	tpi(3)	yqiL(2)		barcode93	45		barcode85
barcode94	5	100	arcC(1)	aroE(4)	glpF(1)	gmk(4)	pta(12)	tpi(1)	yqiL(10)		barcode94	5		barcode86
barcode95	5	100	arcC(1)	aroE(4)	glpF(1)	gmk(4)	pta(12)	tpi(1)	yqiL(10)		barcode95	5		barcode87
barcode96	8	100	arcC(3)	aroE(3)	glpF(1)	gmk(1)	pta(4)	tpi(4)	yqiL(3)		barcode96	8		barcode88

## Sheet: Run5
Sequence type predictions of Krocus and nanoMLST2 for Run5 in the first flow cell
Krocus prediction	ST	Percentage									nanoMLST2 prediction
barcode01	3235	100	arcC(1)	aroE(1)	glpF(1)	gmk(9)	pta(1)	tpi(1)	yqiL(405)		barcode01	3235
barcode02	ND	71.18	arcC(151)	glpF(215)	pta(175)	tpi(37)*	yqiL(3)				barcode02	LSD
barcode03	508	100	arcC(10)	aroE(40)	glpF(8)	gmk(6)	pta(10)	tpi(3)	yqiL(2)		barcode03	508
barcode04	188	99.68	arcC(3)	aroE(1)	glpF(1)	gmk(8)	pta(1)*	tpi(1)	yqiL(1)		barcode04	New allele
barcode05	15	100	arcC(13)	aroE(13)	glpF(1)	gmk(1)	pta(12)	tpi(11)	yqiL(13)		barcode05	15
barcode06	45	100	arcC(10)	aroE(14)	glpF(8)	gmk(6)	pta(10)	tpi(3)	yqiL(2)		barcode06	45
barcode07	8	100	arcC(3)	aroE(3)	glpF(1)	gmk(1)	pta(4)	tpi(4)	yqiL(3)		barcode07	8
barcode08	ND	67.42	arcC(151)	glpF(215)	pta(175)	tpi(180)*	yqiL(11)*				barcode08	LSD
barcode09	45	100	arcC(10)	aroE(14)	glpF(8)	gmk(6)	pta(10)	tpi(3)	yqiL(2)		barcode09	45
barcode10	59	100	arcC(19)	aroE(23)	glpF(15)	gmk(2)	pta(19)	tpi(20)	yqiL(15)		barcode10	59
barcode11	188	100	arcC(3)	aroE(1)	glpF(1)	gmk(8)	pta(1)	tpi(1)	yqiL(1)		barcode11	188
barcode12	239	100	arcC(2)	aroE(3)	glpF(1)	gmk(1)	pta(4)	tpi(4)	yqiL(3)		barcode12	239
barcode13	239	100	arcC(2)	aroE(3)	glpF(1)	gmk(1)	pta(4)	tpi(4)	yqiL(3)		barcode13	239
barcode14	ND	65.72	arcC(151)	glpF(215)	gmk(34)*	pta(175)	tpi(180)*	yqiL(268)*			barcode14	LSD
barcode15	15	100	arcC(13)	aroE(13)	glpF(1)	gmk(1)	pta(12)	tpi(11)	yqiL(13)		barcode15	15
barcode16	8	100	arcC(3)	aroE(3)	glpF(1)	gmk(1)	pta(4)	tpi(4)	yqiL(3)		barcode16	8
barcode17	8	100	arcC(3)	aroE(3)	glpF(1)	gmk(1)	pta(4)	tpi(4)	yqiL(3)		barcode17	8
barcode18	15	100	arcC(13)	aroE(13)	glpF(1)	gmk(1)	pta(12)	tpi(11)	yqiL(13)		barcode18	15
barcode19	88	100	arcC(22)	aroE(1)	glpF(14)	gmk(23)	pta(12)	tpi(4)	yqiL(31)		barcode19	88
barcode20	ND	61.57	arcC(151)	glpF(215)	gmk(275)*	pta(175)	tpi(28)*				barcode20	LSD
barcode21	59	100	arcC(19)	aroE(23)	glpF(15)	gmk(2)	pta(19)	tpi(20)	yqiL(15)		barcode21	59
barcode22	8	100	arcC(3)	aroE(3)	glpF(1)	gmk(1)	pta(4)	tpi(4)	yqiL(3)		barcode22	8
barcode23	8	100	arcC(3)	aroE(3)	glpF(1)	gmk(1)	pta(4)	tpi(4)	yqiL(3)		barcode23	8
barcode24	15	100	arcC(13)	aroE(13)	glpF(1)	gmk(1)	pta(12)	tpi(11)	yqiL(13)		barcode24	15
barcode25	8	100	arcC(3)	aroE(3)	glpF(1)	gmk(1)	pta(4)	tpi(4)	yqiL(3)		barcode25	8
barcode26	8	100	arcC(3)	aroE(3)	glpF(1)	gmk(1)	pta(4)	tpi(4)	yqiL(3)		barcode26	8
barcode27	508	100	arcC(10)	aroE(40)	glpF(8)	gmk(6)	pta(10)	tpi(3)	yqiL(2)		barcode27	508
barcode28	508	100	arcC(10)	aroE(40)	glpF(8)	gmk(6)	pta(10)	tpi(3)	yqiL(2)		barcode28	508
barcode29	1282	100	arcC(2)	aroE(202)	glpF(1)	gmk(1)	pta(4)	tpi(4)	yqiL(3)		barcode29	1282
barcode30	45	100	arcC(10)	aroE(14)	glpF(8)	gmk(6)	pta(10)	tpi(3)	yqiL(2)		barcode30	45
barcode31	30	100	arcC(2)	aroE(2)	glpF(2)	gmk(2)	pta(6)	tpi(3)	yqiL(2)		barcode31	30
barcode32	30	100	arcC(2)	aroE(2)	glpF(2)	gmk(2)	pta(6)	tpi(3)	yqiL(2)		barcode32	30
barcode33	8	100	arcC(3)	aroE(3)	glpF(1)	gmk(1)	pta(4)	tpi(4)	yqiL(3)		barcode33	8
barcode34	8	100	arcC(3)	aroE(3)	glpF(1)	gmk(1)	pta(4)	tpi(4)	yqiL(3)		barcode34	8
barcode35	ND	99.94	arcC(3)	aroE(35)*	glpF(167)	gmk(2)	pta(20)	tpi(58)*	yqiL(39)		barcode35	1232
barcode36	ND	100	arcC(3)	aroE(35)	glpF(167)	gmk(2)	pta(20)	tpi(58)	yqiL(39)		barcode36	1232
barcode37	ND	99.74	arcC(6)	aroE(579)	glpF(213)*	gmk(2)	pta(7)	tpi(12)	yqiL(15)		barcode37	New allele
barcode38	188	100	arcC(3)	aroE(1)	glpF(1)	gmk(8)	pta(1)	tpi(1)	yqiL(1)		barcode38	188
barcode39	7	99.97	arcC(5)	aroE(4)*	glpF(1)	gmk(4)	pta(4)	tpi(6)	yqiL(3)		barcode39	7
barcode40	8	100	arcC(3)	aroE(3)	glpF(1)	gmk(1)	pta(4)	tpi(4)	yqiL(3)		barcode40	8
barcode41	45	100	arcC(10)	aroE(14)	glpF(8)	gmk(6)	pta(10)	tpi(3)	yqiL(2)		barcode41	45
barcode42	15	100	arcC(13)	aroE(13)	glpF(1)	gmk(1)	pta(12)	tpi(11)	yqiL(13)		barcode42	15
barcode43	188	100	arcC(3)	aroE(1)	glpF(1)	gmk(8)	pta(1)	tpi(1)	yqiL(1)		barcode43	188
barcode44	239	100	arcC(2)	aroE(3)	glpF(1)	gmk(1)	pta(4)	tpi(4)	yqiL(3)		barcode44	239
barcode45	ND	56.72	arcC(151)	glpF(215)	pta(175)	tpi(242)*					barcode45	LSD
barcode46	8	100	arcC(3)	aroE(3)	glpF(1)	gmk(1)	pta(4)	tpi(4)	yqiL(3)		barcode46	8
barcode47	1	100	arcC(1)	aroE(1)	glpF(1)	gmk(1)	pta(1)	tpi(1)	yqiL(1)		barcode47	1
barcode48	8	100	arcC(3)	aroE(3)	glpF(1)	gmk(1)	pta(4)	tpi(4)	yqiL(3)		barcode48	8
barcode49	239	100	arcC(2)	aroE(3)	glpF(1)	gmk(1)	pta(4)	tpi(4)	yqiL(3)		barcode49	239
barcode50	239	100	arcC(2)	aroE(3)	glpF(1)	gmk(1)	pta(4)	tpi(4)	yqiL(3)		barcode50	239
barcode51	8	100	arcC(3)	aroE(3)	glpF(1)	gmk(1)	pta(4)	tpi(4)	yqiL(3)		barcode51	8
barcode52	8	100	arcC(3)	aroE(3)	glpF(1)	gmk(1)	pta(4)	tpi(4)	yqiL(3)		barcode52	8
barcode53	97	100	arcC(3)	aroE(1)	glpF(1)	gmk(1)	pta(1)	tpi(5)	yqiL(3)		barcode53	97
barcode54	30	100	arcC(2)	aroE(2)	glpF(2)	gmk(2)	pta(6)	tpi(3)	yqiL(2)		barcode54	30
barcode55	7	100	arcC(5)	aroE(4)	glpF(1)	gmk(4)	pta(4)	tpi(6)	yqiL(3)		barcode55	7
barcode56	15	100	arcC(13)	aroE(13)	glpF(1)	gmk(1)	pta(12)	tpi(11)	yqiL(13)		barcode56	15
barcode57	59	100	arcC(19)	aroE(23)	glpF(15)	gmk(2)	pta(19)	tpi(20)	yqiL(15)		barcode57	59
barcode58	15	100	arcC(13)	aroE(13)	glpF(1)	gmk(1)	pta(12)	tpi(11)	yqiL(13)		barcode58	15
barcode59	7	100	arcC(5)	aroE(4)	glpF(1)	gmk(4)	pta(4)	tpi(6)	yqiL(3)		barcode59	New allele
barcode60	239	100	arcC(2)	aroE(3)	glpF(1)	gmk(1)	pta(4)	tpi(4)	yqiL(3)		barcode60	239
barcode61	239	100	arcC(2)	aroE(3)	glpF(1)	gmk(1)	pta(4)	tpi(4)	yqiL(3)		barcode61	239
barcode62	8	100	arcC(3)	aroE(3)	glpF(1)	gmk(1)	pta(4)	tpi(4)	yqiL(3)		barcode62	8
barcode63	12	100	arcC(1)	aroE(3)	glpF(1)	gmk(8)	pta(11)	tpi(5)	yqiL(11)		barcode63	12
barcode64	59	100	arcC(19)	aroE(23)	glpF(15)	gmk(2)	pta(19)	tpi(20)	yqiL(15)		barcode64	59
barcode65	59	100	arcC(19)	aroE(23)	glpF(15)	gmk(2)	pta(19)	tpi(20)	yqiL(15)		barcode65	59
barcode66	8	100	arcC(3)	aroE(3)	glpF(1)	gmk(1)	pta(4)	tpi(4)	yqiL(3)		barcode66	8
barcode67	8	100	arcC(3)	aroE(3)	glpF(1)	gmk(1)	pta(4)	tpi(4)	yqiL(3)		barcode67	8
barcode68	8	100	arcC(3)	aroE(3)	glpF(1)	gmk(1)	pta(4)	tpi(4)	yqiL(3)		barcode68	8
barcode69	15	100	arcC(13)	aroE(13)	glpF(1)	gmk(1)	pta(12)	tpi(11)	yqiL(13)		barcode69	15
barcode70	15	100	arcC(13)	aroE(13)	glpF(1)	gmk(1)	pta(12)	tpi(11)	yqiL(13)		barcode70	15
barcode71	8	100	arcC(3)	aroE(3)	glpF(1)	gmk(1)	pta(4)	tpi(4)	yqiL(3)		barcode71	8
barcode72	30	100	arcC(2)	aroE(2)	glpF(2)	gmk(2)	pta(6)	tpi(3)	yqiL(2)		barcode72	30
barcode73	7	100	arcC(5)	aroE(4)	glpF(1)	gmk(4)	pta(4)	tpi(6)	yqiL(3)		barcode73	7
barcode74	8	100	arcC(3)	aroE(3)	glpF(1)	gmk(1)	pta(4)	tpi(4)	yqiL(3)		barcode74	8
barcode75	97	100	arcC(3)	aroE(1)	glpF(1)	gmk(1)	pta(1)	tpi(5)	yqiL(3)		barcode75	97
barcode76	1	100	arcC(1)	aroE(1)	glpF(1)	gmk(1)	pta(1)	tpi(1)	yqiL(1)		barcode76	1
barcode77	5	100	arcC(1)	aroE(4)	glpF(1)	gmk(4)	pta(12)	tpi(1)	yqiL(10)		barcode77	5
barcode78	1232	100	arcC(3)	aroE(35)	glpF(167)	gmk(2)	pta(20)	tpi(26)	yqiL(39)		barcode78	1232
barcode79	8	100	arcC(3)	aroE(3)	glpF(1)	gmk(1)	pta(4)	tpi(4)	yqiL(3)		barcode79	8
barcode80	8	100	arcC(3)	aroE(3)	glpF(1)	gmk(1)	pta(4)	tpi(4)	yqiL(3)		barcode80	8
barcode81	97	100	arcC(3)	aroE(1)	glpF(1)	gmk(1)	pta(1)	tpi(5)	yqiL(3)		barcode81	97
barcode82	45	100	arcC(10)	aroE(14)	glpF(8)	gmk(6)	pta(10)	tpi(3)	yqiL(2)		barcode82	45
barcode83	97	100	arcC(3)	aroE(1)	glpF(1)	gmk(1)	pta(1)	tpi(5)	yqiL(3)		barcode83	97
barcode84	15	100	arcC(13)	aroE(13)	glpF(1)	gmk(1)	pta(12)	tpi(11)	yqiL(13)		barcode84	15
barcode85	239	100	arcC(2)	aroE(3)	glpF(1)	gmk(1)	pta(4)	tpi(4)	yqiL(3)		barcode85	239
barcode86	15	100	arcC(13)	aroE(13)	glpF(1)	gmk(1)	pta(12)	tpi(11)	yqiL(13)		barcode86	15
barcode87	59	100	arcC(19)	aroE(23)	glpF(15)	gmk(2)	pta(19)	tpi(20)	yqiL(15)		barcode87	59
barcode88	45	100	arcC(10)	aroE(14)	glpF(8)	gmk(6)	pta(10)	tpi(3)	yqiL(2)		barcode88	45
barcode89	1155	100	arcC(69)	aroE(1)	glpF(14)	gmk(15)	pta(11)	tpi(19)	yqiL(3)		barcode89	1155
barcode90	45	100	arcC(10)	aroE(14)	glpF(8)	gmk(6)	pta(10)	tpi(3)	yqiL(2)		barcode90	45
barcode91	8	100	arcC(3)	aroE(3)	glpF(1)	gmk(1)	pta(4)	tpi(4)	yqiL(3)		barcode91	8
barcode92	8	100	arcC(3)	aroE(3)	glpF(1)	gmk(1)	pta(4)	tpi(4)	yqiL(3)		barcode92	8
barcode93	15	100	arcC(13)	aroE(13)	glpF(1)	gmk(1)	pta(12)	tpi(11)	yqiL(13)		barcode93	15
barcode94	15	100	arcC(13)	aroE(13)	glpF(1)	gmk(1)	pta(12)	tpi(11)	yqiL(13)		barcode94	15
barcode95	30	100	arcC(2)	aroE(2)	glpF(2)	gmk(2)	pta(6)	tpi(3)	yqiL(2)		barcode95	30
barcode96	ND	75.96	arcC(151)	aroE(345)*	glpF(215)	gmk(6)*	pta(175)	tpi(180)*	yqiL(799)*		barcode96	LSD

## Sheet: Cost estimation
Cost estimation in this study
Experiment	Reagent	Unit price	Number of samples per unit	Price per sample
DNA extraction	DNAzol Direct (DN131)	179	2000	0.09
PCR preparation	primers	70	1400	0.05
PCR	Phusion™ High-Fidelity DNA Polymerase (F530L)	732	1000	0.73
Library preparation	Rapid Barcoding Kit 96 (SQK-RBK110.96)	990	96×9	1.15
Nanopore sequencing	MinION flowcell (FLO-MIN106)	900	96×5	1.88
Wash	Flow Cell Wash Kit (EXP-WSH004)	85	96×6	0.15

## Sheet: Reads
FASTQ sequences produced in this study
First flow cell
Run1	https://drive.google.com/file/d/1MU2hewSrtQ_5MEov3qFEADExLSg1hBZ4/view?usp=sharing
Run2	https://drive.google.com/file/d/10T2oL8ZoPVLzx2Y10gEidMgqPvxsOqQA/view?usp=sharing
Run3	https://drive.google.com/file/d/1xavrpF1chf7bHy7wK3Ko0Oy1whIm3itF/view?usp=sharing
Run4	https://drive.google.com/file/d/1nQ-PKr5bUQ8XoQv7treS04W7Jg3gnHEp/view?usp=sharing
Run5	https://drive.google.com/file/d/1upQ1L6dn-vUnS4ibj0NeUSgBfLJtBiJL/view?usp=sharing
Second flow cell
Run1	https://drive.google.com/file/d/1TKckcPD5O8d_VHChqS0-s1fkQAEAhNij/view?usp=sharing
Run2	https://drive.google.com/file/d/1pb_16YsGUoTeHAIsu_oFCEwkc9trsxKb/view?usp=sharing
Run3	https://drive.google.com/file/d/1yra_wt5-reMrI8rkA3m30KBySoe-QsC4/view?usp=sharing
Run4	https://drive.google.com/file/d/1aLuhizNAHWd0p3ukDqbMcltKV8CySVoS/view?usp=sharing
Run5	https://drive.google.com/file/d/170ptku5ragNIOtE6eSM8Brsa2wmwmw2p/view?usp=sharing
